# Supplementary material
Source: PubMed Central journal article supplement (PMC9669266)
Supplement: 40121_2022_710_MOESM1_ESM.pdf [file 40121_2022_710_MOESM1_ESM.pdf]

# Exploring the Role of Antiviral Nasal Sprays in the Control of Emerging Respiratory Infections in the Community

Christoforos Hadjichrysanthou<sup>1\*</sup>, Anna L. Beukenhorst<sup>2,3</sup>, Clarissa M. Koch<sup>2</sup>, Galit Alter<sup>2,4</sup>, Jaap Goudsmit<sup>2,5</sup>, Roy M. Anderson<sup>1</sup>, Frank de Wolf<sup>1</sup>

<sup>1</sup> Department of Infectious Disease Epidemiology, School of Public Health, Imperial College London, London, United Kingdom

<sup>2</sup> Leyden Laboratories B.V., Leiden, The Netherlands

<sup>3</sup> Department of Biostatistics, Harvard T.H. Chan School of Public Health, Boston, MA, US

<sup>4</sup> Ragon Institute of MGH, MIT and Harvard, Cambridge, MA, USA

<sup>5</sup> Departments of Epidemiology, Immunology and Infectious Diseases, Harvard TH Chan School of Public Health, Boston, MA, USA.

\*email: [c.hadjichrysanthou@imperial.ac.uk](mailto:c.hadjichrysanthou@imperial.ac.uk)

## Supplementary Material

### Overview of developments in intranasal antiviral prophylaxis

Neutralising antibodies against a broad range of respiratory viruses can be administered through the inhaled route for the direct and immediate protection of the susceptible mucosal surface which is the primary route of virus entry [1-4]. Antibody in mucosal secretions may protect the target epithelial cells, prevent infection mainly through immune exclusion and virus neutralisation and reduce upper-airway symptoms [2]. Intranasal administration of neutralising antibodies may also limit the progression of the infection and shorten its duration [2]. Infected cells can be eliminated via antibody-dependent cellular cytotoxicity and cytolytic T cell activity. Some evidence of the prophylactic effectiveness of nasal antibody treatments against respiratory tract infections has been demonstrated in human studies [2].

Rapid boosting of the innate immune response by using intranasal interferon (IFN) administration has also been suggested as a desirable option for prophylaxis or early treatment of emerging respiratory virus infections, but more studies to prove safety and efficacy are required [5-8]. Prophylactic IFN treatments (including intranasal treatments) are being assessed in ongoing clinical trials [8]. Studies have also focused on the formulation of a polysaccharide-based spray which directly contacts the nasal mucosa lining the epithelium. Such nasal sprays can protect the nasal epithelium by trapping the virus within the sprayed layer blocking the entry into the cells, which is then eliminated through natural nasal clearance mechanisms. Viral replication can also be inhibited by the formation of a steric barrier across the cell interface which can block the virus entry into the cells, and/or by adsorption of the polymer to the interface of the virus [9].

Animal studies have shown that intranasal administration of compounds which stimulate protective innate immune responses could also improve the ability of the epithelium to respond quickly when the virus enters the epithelium of the upper respiratory tract. There is a substantial body of evidence that such treatments could serve as suitable antimicrobial or antiviral agents to restrict viral replication in the nasal epithelia, decline viral transmission to the lower respiratory tract that causes severe disease, and suppress excessive virus-induced airway inflammation and tissue damage. The treatments have also been effective in reducing viral transmission between animals [10-13]. The success of such animal models demonstrates the potential for the development of successful intranasal prophylactic treatments in humans to mitigate the impact of respiratory pathogens. A biotechnology company, ENA Respiratory, is conducting Phase II clinical studies of a novel nasal spray that can be self-administered to stimulate the innate immunity in the nose, aiming at the elimination of respiratory viruses before they spread to the lower airways [14]. Vries et al. [15] have developed animal models to show the prophylactic effect of similar intranasal treatments which prevent membrane fusion between the virus and the cells. Administration via the nasal route of novel peptide fusion inhibitors that target conserved regions of the virus surface have been tested in animal models showing highly preventative and protective effect against multiple pathogenic viruses [15, 16]. For example, studies have shown that daily intranasal administration of fusion-inhibitory lipopeptides to ferrets could provide complete protection against SARS-CoV-2 transmission through direct-contact between animals [15]. Table S1 presents some of the studies on intranasal prophylaxis against respiratory virus infections.

**Table S1. Overview of studies on intranasal prophylaxis against respiratory virus infections**

| <b>Code</b>                                         | <b>Technology</b>                      | <b>Virus</b>                              | <b>Stage in the development process</b> | <b>Reference</b> |
|-----------------------------------------------------|----------------------------------------|-------------------------------------------|-----------------------------------------|------------------|
| EK1C4                                               | Peptide                                | SARS-CoV-2, SARS-CoV, MERS-CoV, HCoV-OC43 | Animal studies (mice)                   | [17]             |
| OC43-HR2P, EK1                                      | Peptide                                | HCoV-OC43, MERS-CoV                       | Animal studies (mice)                   | [16]             |
| [SARSHRC-PEG <sub>4</sub> ] <sub>2</sub> -chol      | Lipopeptide                            | SARS-CoV-2, SARS-CoV, MERS-CoV            | Animal studies (ferrets)                | [15]             |
| H5-VHH                                              | Nanobody                               | Influenza A                               | Animal studies (mice)                   | [18]             |
| Nb <sub>15</sub> -Nb <sub>H</sub> -Nb <sub>15</sub> | Nanobody                               | SARS-CoV-2                                | Animal studies (mice)                   | [19]             |
| TriSb92                                             | Antibody mimetic                       | SARS-CoV-2                                | Animal studies (mice)                   | [20]             |
| CF-401, CF402, CF-403                               | Antibody                               | Influenza A and B                         | Animal studies (mice)                   | [21]             |
| CR8020, CR6261                                      | Antibody                               | Influenza A                               | Animal studies (mice)                   | [21]             |
| 5A7                                                 | Antibody                               | Influenza B                               | Animal studies (mice)                   | [21]             |
| IgM-14                                              | Antibody                               | SARS-CoV-2                                | Animal studies (mice)                   | [4]              |
| InvisiMask                                          | Antibody                               | SARS-CoV-2                                | Animal studies (mice)                   | [22]             |
| DZIF-10c                                            | Antibody                               | SARS-CoV-2                                | Animal studies (mice)                   | [23]             |
| F61, H121                                           | Antibody                               | SARS-CoV-2                                | Animal studies (mice)                   | [24]             |
| ftIFN- $\alpha$                                     | Type I interferon (IFN), IFN- $\alpha$ | Influenza A                               | Animal studies (ferrets)                | [6]              |
| rhIFN- $\alpha$                                     | Recombinant human interferon alpha     | SARS-CoV-2                                | 'Prospective open-label clinical trial' | [7]              |

|          |                                              |                     |                                                                                                   |      |
|----------|----------------------------------------------|---------------------|---------------------------------------------------------------------------------------------------|------|
| Pam2Cys  | Toll-like receptor-2 agonist                 | Influenza A         | Animal studies (mice)                                                                             | [10] |
| INNA-X   | TLR2-mediated activation of innate responses | Influenza A (Udorn) | Animal studies (mice)                                                                             | [11] |
| INNA-X   | TLR2-mediated activation of innate responses | Rhinovirus          | Animal studies (mice)                                                                             | [12] |
| INNA-051 | TLR2/TLR6 agonist                            | SARS-CoV-2          | Animal studies (ferrets)                                                                          | [13] |
| INNA-051 | TLR2/TLR6 agonist                            | Influenza A         | A single centre, prospective, randomised, double-blind, placebo-controlled study, Phase IIa trial | [14] |
| pHOXWELL | A combination of natural virucides           | SARS-CoV-2          | A randomised, double-blind, placebo-controlled study - Phase II/III trial                         | [25] |
| NONS     | Nanomolecule                                 | SARS-CoV-2          | Phase III trial                                                                                   | [26] |

## The deterministic mathematical model

### Model compartments

Susceptible,  $S$ : Individuals susceptible to infection.

Partially protected susceptible,  $S_p$ : Susceptible individuals receive the intranasal treatment, with rate  $q_s$ , and become partially protected; they can still get exposed to the virus and become infected but with a lower probability (the treatment reduces the infection rates from  $\beta_{s_1}, \beta_{m_1}, \beta_{m_2}$  to  $\beta_{sp_1}, \beta_{mp_1}, \beta_{mp_2}$ , respectively). The treatment effect lasts for  $1/l_s$  days.

Exposed,  $E$ : Individuals that have been exposed to the infection but are not yet infectious.

Partially protected (Exposed),  $E_p$ : Exposed individuals can still receive the treatment, with rate  $q_E$ . This reduces the risk of developing severe infection from  $1 - p_E$  to  $1 - p_{E_p}$ . Partially protected susceptible individuals,  $S_p$ , that get exposed to the virus also move to this class. The treatment can provide protection to exposed individuals for  $1/l_E$  days.

Infectious (mild),  $I_m$ : Individuals that become infected and infectious with mild symptoms.

Infectious (severe),  $I_s$ : Individuals that become infected and infectious with severe symptoms.

Treated Infectious (mild),  $I_{mp}$ : Individuals that become infected and infectious with mild symptoms and have received the treatment, with rate  $q_{I_m}$ . Individuals that are in the  $E_p$  class also move to the  $I_{mp}$  class. The intranasal treatment could potentially reduce the infectious period from  $1/\gamma_m$  to  $1/\gamma_{mp}$  and the probability of transmitting the virus to other individuals (reducing the infection rates from  $\beta_{m_1}$  and  $\beta_{mp_1}$  to  $\beta_{m_2}$  and  $\beta_{mp_2}$ , respectively). The treatment is effective for  $1/l_{I_m}$  days.

Hospitalised,  $H_s$ : Severely infected individuals that are admitted to the hospital.

Intensive care unit (ICU),  $C$ : Hospitalised individuals that are transferred to ICU.

Hospitalised post ICU,  $H_{pc}$ : Individuals that leave ICU and move to general ward until recovery.

Dead,  $D$ : Hospitalised individuals ( $H_s + C$ ) that die from the infection.

Recovered,  $R$ : Individuals that recover from the disease. As we are interested in the effect of the treatment within a short period of time, we assume that recovered individuals are immune to re-infection for this duration.

Vaccinated,  $V$ : When a vaccine is available, susceptible, exposed and recovered individuals can be vaccinated.

### The ordinary differential equation model

Let  $X$  denote the population in compartment  $X$ ,  $X \in \{S, S_p, E, E_p, I_m, I_{mp}, I_s, H_s, C, H_{pc}, R, D\}$ . Due to the short-term infection dynamics, we do not model the aging processes, as well as birth and deaths. The dynamical changes of the different compartments are consistent with the following equations:

$$\frac{dS}{dt} = -\beta_{s_1}SI_s - \beta_{m_1}SI_m - \beta_{m_2}SI_{mp} - q_sS - v\varepsilon_vS + l_sS_p$$

$$\frac{dS_p}{dt} = q_sS - \beta_{sp_1}S_pI_s - \beta_{mp_1}S_pI_m - \beta_{mp_2}S_pI_{mp} - l_sS_p - v\varepsilon_vS_p$$

$$\frac{dE}{dt} = \beta_{s_1} S I_s + \beta_{m_1} S I_m + \beta_{m_2} S I_{mp} + l_E E_p - q_E E - \mu E - v \varepsilon_v E$$

$$\frac{dE_p}{dt} = \beta_{sp_1} S_p I_s + \beta_{mp_1} S_p I_m + \beta_{mp_2} S_p I_{mp} + q_E E - l_E E_p - \mu E_p - v \varepsilon_v E_p$$

$$\frac{dI_s}{dt} = (1 - p_E) \mu E + (1 - p_{E_p}) \mu E_p - p_{I_s} \gamma_s I_s - (1 - p_{I_s}) h_s I_s$$

$$\frac{dI_m}{dt} = p_E \mu E + l_m I_{mp} - \gamma_m I_m - q_{I_m} I_m$$

$$\frac{dI_{mp}}{dt} = p_{E_p} \mu E_p + q_{I_m} I_m - \gamma_{mp} I_{mp} - l_m I_{mp}$$

$$\frac{dH_s}{dt} = (1 - p_{I_s}) h_s I_s - p_{H_s1} \gamma_h H_s - p_{H_s2} c_h H_s - (1 - p_{H_s1} - p_{H_s2}) d_h H_s$$

$$\frac{dC}{dt} = p_{H_s2} c_h H_s - p_C h_c C - (1 - p_C) d_c C$$

$$\frac{dH_{pc}}{dt} = p_C h_c C - \gamma_C H_{pc}$$

$$\frac{dR}{dt} = \gamma_m I_m + \gamma_{mp} I_{mp} + p_{I_s} \gamma_s I_s + p_{H_s1} \gamma_h H_s + \gamma_C H_{pc} - v \varepsilon_v R$$

$$\frac{dD}{dt} = (1 - p_{H_s1} - p_{H_s2}) d_h H_s + (1 - p_C) d_c C$$

$$S + S_p + E + E_p + I_s + I_m + I_{mp} + H_s + C + H_{pc} + R + D + V = 1.$$

We assume that

$$\beta_{sp_1} = (1 - f_1) \beta_{s_1}, \beta_{mp_1} = (1 - f_1) \beta_{m_1}, \beta_{mp_2} = (1 - f_1)(1 - f_4) \beta_{m_2}, f_1, f_4 \in [0, 1],$$

$$p_{E_p} = p_E + f_2(1 - p_E), f_2 \in [0, 1],$$

$$\gamma_{mp} = \frac{1}{1 - f_3} \gamma_m, f_3 \in [0, 1],$$

$$\beta_{m_2} = (1 - f_4) \beta_{m_1}, f_4 \in [0, 1],$$

where  $f_1$  and  $f_2$  describe the effectiveness of the treatment in reducing the transmission rate and the probability of developing severe infection, respectively.  $f_3$  describes the effectiveness of the treatment in reducing the infectious period  $\gamma_m$ .  $f_4$  describes the effectiveness of the treatment in reducing the probability of virus transmission from a mildly infected individual that has received the prophylaxis.

### Basic reproduction number, $R_0$

At the disease-free steady state, before the outbreak, we have:

$$\frac{dS}{dt} = 0 \Rightarrow -q_s S^* + l_s S_p^* - v \varepsilon_v S^* = 0 \Rightarrow S^* = \frac{l_s}{q_s + v \varepsilon_v} S_p^*.$$

$$\frac{dS_p}{dt} = 0 \Rightarrow q_s S^* - l_s S_p^* - v \varepsilon_v S_p^* = 0 \Rightarrow S_p^* = \frac{q_s}{l_s + v \varepsilon_v} S^*.$$

$$S^* + S_p^* = 1 \Rightarrow S^* = \frac{l_s}{l_s + q_s + v \varepsilon_v}, S_p^* = \frac{q_s + v \varepsilon_v}{l_s + q_s + v \varepsilon_v}.$$

Let  $p_p$  be the proportion of susceptible individuals that take the prophylaxis at the disease-free steady state.

The basic reproduction number is the dominant eigenvalue of the next-generation matrix,  $FV^{-1}$ , where

$$F = \begin{bmatrix} 0 & 0 & \beta_{s_1}(1-p_p) & \beta_{m_1}(1-p_p) & \beta_{m_2}(1-p_p) \\ 0 & 0 & \beta_{sp_1}p_p & \beta_{mp_1}p_p & \beta_{mp_2}p_p \\ 0 & 0 & 0 & 0 & 0 \\ 0 & 0 & 0 & 0 & 0 \\ 0 & 0 & 0 & 0 & 0 \end{bmatrix},$$

$$V = \begin{bmatrix} -(q_E + \mu + v\varepsilon_v) & l_E & 0 & 0 & 0 \\ q_E & -(l_E + \mu + v\varepsilon_v) & 0 & 0 & 0 \\ (1-p_E)\mu & (1-p_{E_p})\mu & -(p_{I_s}\gamma_s + (1-p_{I_s})h_s) & 0 & 0 \\ p_E\mu & 0 & 0 & -(\gamma_m + q_{I_m}) & l_{I_m} \\ 0 & p_{E_p}\mu & 0 & q_{I_m} & -(\gamma_{mp} + l_{I_m}) \end{bmatrix}.$$

The determinant of  $V$ ,  $|V|$ , is given by

$$|V| = -(\mu + v\varepsilon_v)(p_{I_s}\gamma_s + (1-p_{I_s})h_s)(q_E + l_E + \mu + v\varepsilon_v)[\gamma_m(\gamma_{mp} + l_{I_m}) + \gamma_{mp}q_{I_m}],$$

and  $V^{-1} = \frac{adj(V)}{|V|}$ , where  $adj(V)$  is the adjoint of a  $V$ . We get that:

$$R_0 = \frac{\mu}{(\mu + v\varepsilon_v)(q_E + l_E + \mu + v\varepsilon_v)} \left( \frac{\beta_{s_1} [(1-p_p)[q_E(1-p_{E_p}) + (1-p_E)(l_E + \mu + v\varepsilon_v)] + (1-f_1)p_p [(q_E + \mu + v\varepsilon_v)(1-p_{E_p}) + l_E(1-p_E)]}{p_{I_s}\gamma_s + (1-p_{I_s})h_s} \right. \\ \left. + \frac{\beta_{m_1} [(1-p_p)[q_E l_{I_m} p_{E_p} + p_E(l_E + \mu + v\varepsilon_v)(\gamma_{mp} + l_{I_m})] + (1-f_1)p_p [(q_E + \mu + v\varepsilon_v)l_{I_m} p_{E_p} + p_E l_E (\gamma_{mp} + l_{I_m})] + \beta_{m_2} [(1-p_p)[q_E(\gamma_m + q_{I_m})p_{E_p} + p_E q_{I_m}(l_E + \mu + v\varepsilon_v)] + (1-f_1)p_p [(q_E + \mu + v\varepsilon_v)(\gamma_m + q_{I_m})p_{E_p} + p_E q_{I_m} l_E]}{\gamma_m(\gamma_{mp} + l_{I_m}) + q_{I_m}\gamma_{mp}} \right).$$

If  $f_1 = 1$ , then

$$R_0 = \frac{\mu(1-p_p)}{(\mu + v\varepsilon_v)(q_E + l_E + \mu + v\varepsilon_v)} \left( \frac{\beta_{s_1}(1-p_E)(l_E + \mu + v\varepsilon_v)}{p_{I_s}\gamma_s + (1-p_{I_s})h_s} + \frac{\beta_{m_1}[q_E l_{I_m} + p_E(l_E + \mu + v\varepsilon_v)(\gamma_{mp} + l_{I_m})] + \beta_{m_2}[q_E(\gamma_m + q_{I_m}) + p_E q_{I_m}(l_E + \mu + v\varepsilon_v)]}{\gamma_m(\gamma_{mp} + l_{I_m}) + q_{I_m}\gamma_{mp}} \right).$$

In the absence of treatment,  $R_0$  becomes

$$R_0 = \frac{\mu}{(\mu + v\varepsilon_v)} \left( \frac{\beta_{s_1}(1-p_E)}{(p_{I_s}\gamma_s + (1-p_{I_s})h_s)} + \frac{\beta_{m_1} p_E}{\gamma_m} \right).$$

## Parameter values

Table S2: Model parameter values

| Virus                                                                                                     | SARS-CoV-2                             |
|-----------------------------------------------------------------------------------------------------------|----------------------------------------|
| Basic reproduction number, $R_0$                                                                          | 2.8<br>[27]                            |
| Transmission rates when in contact with infectious individuals,<br>$\beta_{s1} = \beta_{m1} = \beta_{m2}$ | Calculated from $R_0$<br>(see formula) |
| Probability of developing mild/asymptomatic infection, $p_E$                                              | 0.45<br>[27]                           |
| Probability of severely infected individuals being hospitalised, $1 - p_{I_s}$                            | 0.49<br>[27]                           |
| Probability of ICU admission if hospitalised, $p_{H_s2}$                                                  | 0.27<br>[27]                           |
| Probability of death during hospitalisation, $1 - p_{H_s1} - p_{H_s2}$                                    | 0.33<br>[27]                           |
| Probability of death when in ICU, $1 - p_c$                                                               | 0.63<br>[27]                           |
| Mean incubation period, $\frac{1}{\mu}$                                                                   | 3.4 days<br>[27]                       |
| Mean duration of mild infection before recovery, $\frac{1}{\gamma_m}$                                     | 2.9 days<br>[27]                       |
| Mean duration of severe infection before recovery, $\frac{1}{\gamma_s}$                                   | 5.7 days<br>[27]                       |
| Mean duration of severe infection before hospitalisation, $\frac{1}{h_s}$                                 | 5.7 days (assumed)<br>[27]             |
| Mean duration of hospitalisation before recovery, $\frac{1}{\gamma_h}$                                    | 10.7 days<br>[27]                      |
| Mean duration of hospitalisation before ICU, $\frac{1}{c_h}$                                              | 2.5 days<br>[27]                       |
| Mean duration of hospitalisation before death, $\frac{1}{d_h}$                                            | 10.3 days<br>[27]                      |
| Mean duration in ICU before returning to a general ward, $\frac{1}{h_c}$                                  | 15.6 days<br>[27]                      |
| Mean duration in ICU before death, $\frac{1}{d_c}$                                                        | 11.8 days<br>[27]                      |
| Mean duration of hospitalisation in a general ward post ICU until<br>recovery, $\frac{1}{\gamma_c}$       | 12.2 days<br>[27]                      |



## The fraction of hospitalisations averted: $R_0 = 5.0$

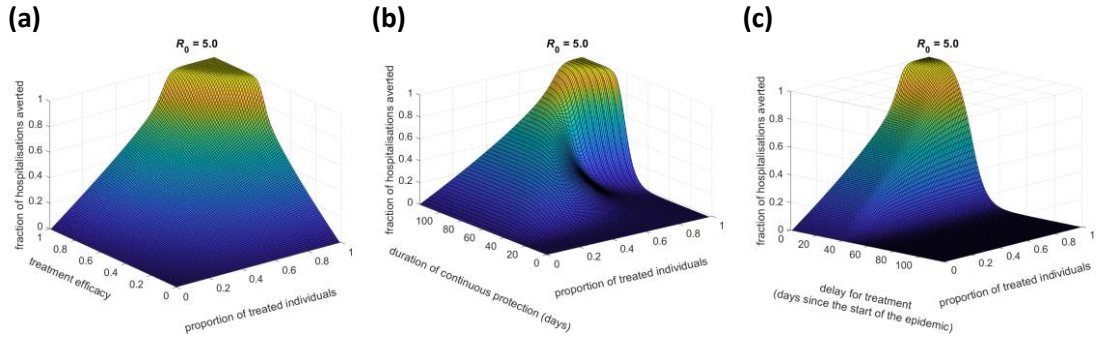

**Fig. S1** The fraction of hospitalisations averted within 120 days as a function of the proportion of the population that continuously receives intranasal prophylaxis and **a** the treatment efficacy (treatment initiates at day 0 and continues up to day 120), **b** the duration of continuous administration from the beginning of the outbreak, **c** the delay in treatment initiation (when treatment administration begins, it is continuous up to day 120). Initially, a proportion 0.0001 with mild infection is introduced into a wholly susceptible population.  $R_0 = 5.0$ .  $\beta_{s_1} = \beta_{m_1} = \beta_{m_2}$ ,  $\beta_{sp_1} = \beta_{mp_1} = \beta_{mp_2}$ . In **a**,  $f_1 = f_2 = f_3, f_4 = 0$ . In **b** and **c**,  $f_1 = f_2 = f_3 = 0.7, f_4 = 0$ . In all cases, intranasal prophylaxis starts before and continues after the exposure to the virus and during a mild infection

## Effect of intranasal antibody prophylaxis in a small closed population

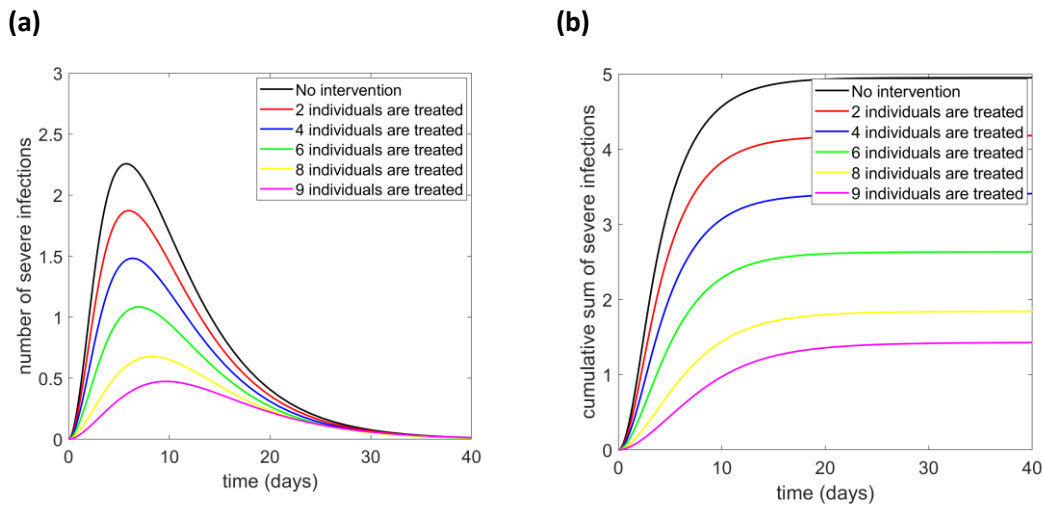

**Fig. S2** **a** The number, and **b** the cumulative sum, of severe infections in a small group of 10 individuals. In such cases, a large proportion of the group could take intranasal antibody prophylaxis continuously until the elimination of the virus within the group. It is assumed that the group is isolated from the community (e.g., it may represent the members of a household during the self-isolation period when some of them have been infected). In this example, one individual of the group has initially been mildly infected.  $R_0 = 2.8$ .  $f_1 = f_2 = f_3 = 0.7$ .  $\beta_{s_1} = \beta_{m_1} = \beta_{m_2}$ ,  $\beta_{sp_1} = \beta_{mp_1} = \beta_{mp_2}$ . In all cases, intranasal prophylaxis starts before and continues after the exposure to the virus and during a mild infection

## Relative risk

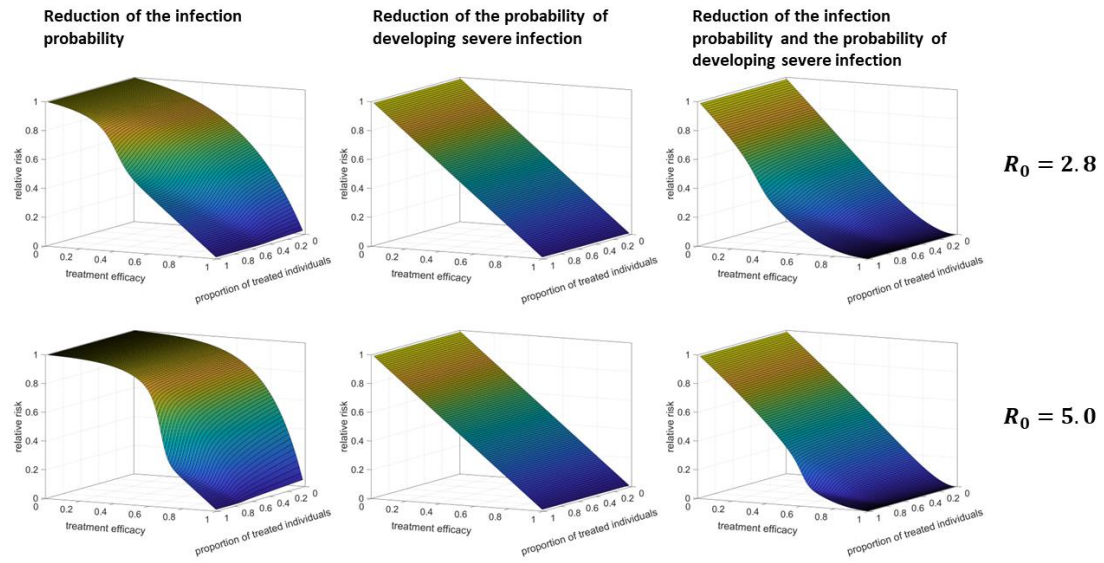

**Fig. S3** The relative risk of developing severe infection by day 120 for intranasal antibody prophylaxis with different mechanisms of action. The efficacy of intranasal prophylaxis and the initial proportion of individuals that receive the prophylaxis continuously for 120 days are varying. Initially, a proportion 0.0001 with mild infection is introduced into a wholly susceptible population.  $\beta_{S_1} = \beta_{m_1} = \beta_{m_2}$ ,  $\beta_{Sp_1} = \beta_{mp_1} = \beta_{mp_2}$

## References

1. Parray HA, Shukla S, Perween R, et al. Inhalation monoclonal antibody therapy: a new way to treat and manage respiratory infections. *Applied microbiology and biotechnology*. 2021;105(16-17):6315-32. doi:10.1007/s00253-021-11488-4
2. Weltzin R, Monath TP. Intranasal Antibody Prophylaxis for Protection against Viral Disease. *Clinical Microbiology Reviews*. 1999;12(3):383-93. doi:10.1128/CMR.12.3.383
3. Gallo O, Locatello LG, Mazzoni A, Novelli L, Annunziato F. The central role of the nasal microenvironment in the transmission, modulation, and clinical progression of SARS-CoV-2 infection. *Mucosal Immunology*. 2021;14(2):305-16. doi:10.1038/s41385-020-00359-2
4. Ku Z, Xie X, Hinton PR, et al. Nasal delivery of an IgM offers broad protection from SARS-CoV-2 variants. *Nature*. 2021;595(7869):718-23. doi:10.1038/s41586-021-03673-2
5. Lee AC, Jeong Y, Lee S, et al. Nasopharyngeal Type-I Interferon for Immediately Available Prophylaxis Against Emerging Respiratory Viral Infections. *Frontiers in Immunology*. 2021;12(1927). doi:10.3389/fimmu.2021.660298
6. Kugel D, Kochs G, Obojes K, et al. Intranasal Administration of Alpha Interferon Reduces Seasonal Influenza A Virus Morbidity in Ferrets. *Journal of Virology*. 2009;83(8):3843-51. doi:10.1128/JVI.02453-08
7. Meng Z, Wang T, Chen L, et al. The Effect of Recombinant Human Interferon Alpha Nasal Drops to Prevent COVID-19 Pneumonia for Medical Staff in an Epidemic Area. *Current Topics in Medicinal Chemistry*. 2021;21(10):920-7. doi:10.2174/1568026621666210429083050
8. Ben-Zuk N, Dechtman I-D, Henn I, et al. Potential Prophylactic Treatments for COVID-19. *Viruses*. 2021;13(7):1292. doi: 10.3390/v13071292
9. Moakes RJA, Davies SP, Stamatakis Z, Grover LM. Formulation of a Composite Nasal Spray Enabling Enhanced Surface Coverage and Prophylaxis of SARS-COV-2. *Advanced Materials*. 2021;33(26):2008304. doi:10.1002/adma.202008304
10. Tan ACL, Mifsud EJ, Zeng W, et al. Intranasal Administration of the TLR2 Agonist Pam2Cys Provides Rapid Protection against Influenza in Mice. *Molecular Pharmaceutics*. 2012;9(9):2710-8. doi:10.1021/mp300257x
11. Deliyannis G, Wong CY, McQuilten HA, et al. TLR2-mediated activation of innate responses in the upper airways confers antiviral protection of the lungs. *JCI Insight*. 2021;6(5). doi:10.1172/jci.insight.140267
12. Girkin J, Loo S-L, Esneau C, et al. TLR2-mediated innate immune priming boosts lung anti-viral immunity. *European Respiratory Journal*. 2021;58(1):2001584. doi:10.1183/13993003.01584-2020
13. Proud PC, Tsitoura D, Watson RJ, et al. Prophylactic intranasal administration of a TLR2/6 agonist reduces upper respiratory tract viral shedding in a SARS-CoV-2 challenge ferret model. *eBiomedicine*. 2021;63:103153. doi:10.1016/J.EBIOM.2020.103153
14. ENA Respiratory. First Participants Dosed in Phase 2a Study of Pan-Antiviral Nasal Spray. 2022. <https://enarespiratory.com/news>
15. Vries RDd, Schmitz KS, Bovier FT, et al. Intranasal fusion inhibitory lipopeptide prevents direct-contact SARS-CoV-2 transmission in ferrets. *Science*. 2021;371(6536):1379-82. doi:10.1126/science.abf4896
16. Xia S, Yan L, Xu W, et al. A pan-coronavirus fusion inhibitor targeting the HR1 domain of human coronavirus spike. *Science Advances*. 2019;5(4):eaav4580. doi:10.1126/sciadv.aav4580
17. Xia S, Liu M, Wang C, et al. Inhibition of SARS-CoV-2 (previously 2019-nCoV) infection by a highly potent pan-coronavirus fusion inhibitor targeting its spike protein that harbors a high capacity to mediate membrane fusion. *Cell Research*. 2020;30(4):343-55. doi:10.1038/s41422-020-0305-x

18. Ibañez LI, De Filette M, Hultberg A, et al. Nanobodies With In Vitro Neutralizing Activity Protect Mice Against H5N1 Influenza Virus Infection. *The Journal of Infectious Diseases*. 2011;203(8):1063-72. doi:10.1093/infdis/jiq168
19. Wu X, Cheng L, Fu M, et al. A potent bispecific nanobody protects hACE2 mice against SARS-CoV-2 infection via intranasal administration. *Cell Rep*. 2021;37(3):109869. doi:10.1016/j.celrep.2021.109869
20. Mäkelä AR, Uğurlu H, Hannula L, et al. Intranasal inhibitor blocks Omicron and other variants of SARS-CoV-2. *bioRxiv*. 2021:2021.12.28.474326. doi:10.1101/2021.12.28.474326
21. Vigil A, Frias-Staheli N, Carabeo T, Wittekind M, Heise MT. Airway Delivery of Anti-influenza Monoclonal Antibodies Results in Enhanced Antiviral Activities and Enables Broad-Coverage Combination Therapies. *Journal of Virology*. 2020;94(22):e00052-20. doi:10.1128/JVI.00052-20
22. Zhang H, Yang Z, Xiang J, Cui Z, Liu J, Liu C. Intranasal administration of SARS-CoV-2 neutralizing human antibody prevents infection in mice. *bioRxiv*. 2020:2020.12.08.416677. doi:10.1101/2020.12.08.416677
23. Halwe S, Kupke A, Vanshylla K, et al. Intranasal Administration of a Monoclonal Neutralizing Antibody Protects Mice against SARS-CoV-2 Infection. *Viruses*. 2021;13(8):1498. doi:10.3390/v13081498
24. Lu J, Yin Q, Pei R, et al. Nasal delivery of broadly neutralizing antibodies protects mice from lethal challenge with SARS-CoV-2 delta and omicron variants. *Virologica Sinica*. 2022;37(2):238-47. doi:10.1016/j.virs.2022.02.005
25. pHOXWELL: Study Design and Results. 2022. <https://phoxbio.com/#/addendum>
26. Phase III trial for COVID-19 prevention. 2022. <https://sanotize.com/clinical-trials-covid/>
27. Knock ES, Whittles LK, Lees JA, et al. Key epidemiological drivers and impact of interventions in the 2020 SARS-CoV-2 epidemic in England. *Science Translational Medicine*. 2021;13(602):eabg4262. doi:10.1126/scitranslmed.abg4262
